# Supplementary material for: Attitudes toward Aging among College Students: Results from an Intergenerational Reminiscence Project
Source: MDPI journal article supplement (doi:10.3390/bs13070538), 2023-06-28
Supplement: s1 [file s1]

*Supplemental Table S1. Characteristics of older adult participants at pretest*

| Characteristics                  | Sample ( <i>N</i> = 61)            |       | Sample ( <i>N</i> = 103)           |       |
|----------------------------------|------------------------------------|-------|------------------------------------|-------|
|                                  | Mean ( <i>SD</i> ) or <i>n</i> (%) | Range | Mean ( <i>SD</i> ) or <i>n</i> (%) | Range |
| Age                              | 75.15 (6.92)                       | 52-91 | 74.92 (6.74)                       | 65-91 |
| AD8 Score                        | 2.49 (1.16)                        | 2-8   | 2.51 (1.07)                        | 2-8   |
| Number ADLs Help Needed          | 1.44 (1.44)                        | 0-6   | 1.62 (1.69)                        | 0-7   |
| Number IADLs Help Needed         | 3.44 (2.19)                        | 0-9   | 3.58 (2.27)                        | 0-9   |
| Gender                           |                                    |       |                                    |       |
| women                            | 50 (82.0%)                         |       | 83 (80.6%)                         |       |
| men                              | 11 (18.0%)                         |       | 20 (19.4%)                         |       |
| Marital Status                   |                                    |       |                                    |       |
| never married                    | 7 (11.5%)                          |       | 9 (8.7%)                           |       |
| married/cohabitating             | 8 (13.1%)                          |       | 16 (15.5%)                         |       |
| widowed                          | 26 (42.6%)                         |       | 36 (35.5%)                         |       |
| divorced                         | 19 (31.1%)                         |       | 37 (35.9%)                         |       |
| separated                        | 0 (0.0%)                           |       | 2 (1.9%)                           |       |
| other                            | 1 (1.6%)                           |       | 3 (2.9%)                           |       |
| Education                        |                                    |       |                                    |       |
| less than high school            | 5 (8.2%)                           |       | 9 (8.7%)                           |       |
| high school                      | 25 (41.0%)                         |       | 32 (31.3%)                         |       |
| some college                     | 15 (24.6%)                         |       | 35 (34.0%)                         |       |
| Bachelor's degree                | 8 (13.1%)                          |       | 13 (12.6%)                         |       |
| graduate or professional degree  | 8 (13.1%)                          |       | 14 (13.6%)                         |       |
| Race/ethnicity                   |                                    |       |                                    |       |
| white                            | 30 (49.2%)                         |       | 52 (50.5%)                         |       |
| African American or Black        | 26 (42.6%)                         |       | 44 (42.7%)                         |       |
| Hispanic or Latino               | 2 (3.3%)                           |       | 4 (3.9%)                           |       |
| American Indian or Alaska Native | 1 (1.6%)                           |       | 1 (1.0%)                           |       |
| multiple races or other          | 2 (3.3%)                           |       | 2 (1.9%)                           |       |
| Living Companion                 |                                    |       |                                    |       |

|                        |            |            |
|------------------------|------------|------------|
| no one                 | 42 (68.9%) | 68 (66.0%) |
| spouse                 | 6 (9.8%)   | 13 (12.6%) |
| adult child            | 6 (9.8%)   | 10 (9.7%)  |
| sibling                | 2 (3.3%)   | 3 (2.9%)   |
| other                  | 5 (8.2%)   | 9 (8.7%)   |
| Self-rated Health      |            |            |
| poor                   | 5 (8.2%)   | 10 (9.7%)  |
| fair                   | 27 (44.3%) | 44 (42.7%) |
| good                   | 23 (37.7%) | 40 (38.8%) |
| very good              | 5 (8.2%)   | 7 (6.8%)   |
| excellent              | 1 (1.6%)   | 2 (1.9%)   |
| Financial Strain       |            |            |
| not difficult at all   | 17 (27.9%) | 23 (22.3%) |
| a little bit difficult | 17 (27.9%) | 27 (26.2%) |
| somewhat difficult     | 14 (23.0%) | 29 (28.2%) |
| difficult              | 8 (13.1%)  | 16 (15.5%) |
| very difficult         | 5 (8.2%)   | 8 (7.8%)   |
| Self-rated Stress      |            |            |
| extremely stressful    | 5 (8.3%)   | 10 (9.7%)  |
| very stressful         | 4 (6.7%)   | 9 (8.7%)   |
| moderately stressful   | 14 (23.3%) | 24 (23.5%) |
| slightly stressful     | 20 (33.3%) | 32 (31.4%) |
| not stressful          | 17 (28.3%) | 27 (26.5%) |

---
